# Supplementary material
Source: PubMed Central journal article supplement (PMC6724708)
Supplement: NIHMS1033834-supplement-References.pdf [file NIHMS1033834-supplement-References.pdf]

## References:

1. Ackerson B, Hechter R, Sidell M, et al. Human papillomavirus vaccine series completion in boys before and after recommendation for routine immunization. *Vaccine*. 2017;35(6):897-902. doi:10.1016/j.vaccine.2017.01.007.
2. Barboza GE, Dominguez S. A sequential logit model of caretakers' decision to vaccinate children for the human papillomavirus virus in the general population. *Prev Med (Baltim)*. 2016;85:84-89. doi:10.1016/j.ypmed.2016.01.010.
3. Bass SB, Leader A, Shwarz M, Greener J, Patterson F. Correlates to Human Papillomavirus Vaccination Status and Willingness to Vaccinate in Low-Income Philadelphia High School Students. *J Sch Health*. 2015;85(8):527-535. doi:10.1111/josh.12284.
4. Bednarczyk RA, Birkhead GS, Morse DL, Doleyres H, McNutt LA. Human papillomavirus vaccine uptake and barriers: Association with perceived risk, actual risk and race/ethnicity among female students at a New York State university, 2010. *Vaccine*. 2011;29(17):3138-3143. doi:10.1016/j.vaccine.2011.02.045.
5. Bendik MK, Mayo RM, Parker VG. Knowledge, perceptions, and motivations related to HPV vaccination among college women. *J Cancer Educ*. 2011;26(3):459-464. doi:10.1007/s13187-011-0200-8.
6. Berenson AB, Rahman M, Hirth JM, Rupp RE, Sarpong KO. A human papillomavirus vaccination program for low-income postpartum women. *Am J Obstet Gynecol*. 2016;215(3):318.e1-318.e9. doi:10.1016/j.ajog.2016.02.032.
7. Bernat DH, Gerend MA, Chevallier K, Zimmerman MA, Bauermeister JA. Characteristics associated with initiation of the human papillomavirus vaccine among a national sample of male and female young adults. *J Adolesc Heal*. 2013;53(5):630-636. doi:10.1016/j.jadohealth.2013.07.035.
8. Blumenthal J, Frey MK, Worley MJ, Tchabo NE, Soren K, Slomovitz BM. Adolescent Understanding and Acceptance of the HPV Vaccination in an Underserved Population in New York City. *J Oncol*. 2012;2012:904034. doi:10.1155/2012/904034.
9. Brewer NT, Gottlieb SL, Reiter PL, et al. Longitudinal predictors of human papillomavirus vaccine initiation among adolescent girls in a high-risk geographic area. *Sex Transm Dis*. 2011;38(3):197-204. doi:10.1097/OLQ.0b013e3181f12dbf.
10. Caskey R, Lindau ST, Alexander GC. Knowledge and Early Adoption of the HPV Vaccine Among Girls and Young Women: Results of a National Survey. *J Adolesc Heal*. 2009;45(5):453-462. doi:10.1016/j.jadohealth.2009.04.021.
11. Centers for Disease C, Prevention. National, state, and local area vaccination coverage among adolescents aged 13-17 years--United States, 2008. *MMWR Morb Mortal Wkly Rep*. 2009;58(36):997-1001. doi:mm5836a2 [pii].
12. Centers for Disease Control and Prevention (CDC). National, state, and local area vaccination coverage among adolescents aged 13-17 years --- United States, 2009. *MMWR Morb Mortal Wkly Rep*. 2010;59(32):1018-1023. <http://www.ncbi.nlm.nih.gov/pubmed/20724968>. Accessed December 19, 2018.
13. Centers for Disease Control and Prevention. National and State Vaccination Coverage Among Adolescents Aged 13 Through 17 Years -- United States, 2010. *Morb Mortal Wkly Rep*. 2011;60(33):1117-1152. <http://www.ncbi.nlm.nih.gov/pubmed/21866084>. Accessed June 5, 2018.
14. Centers for Disease Control and Prevention. National and state vaccination coverage

- among adolescents aged 13-17 years - United States, 2011. *MMWR Morb Mortal Wkly Rep.* 2012;61(34i):671-677. <http://www.ncbi.nlm.nih.gov/pubmed/22932301>. Accessed June 5, 2018.
15. Chao C, Slezak JM, Coleman KJ, Jacobsen SJ. Papanicolaou screening behavior in mothers and human papillomavirus vaccine uptake in adolescent girls. *Am J Public Health.* 2009;99(6):1137-1142. doi:10.2105/AJPH.2008.147876.
  16. Chun C, Velicer C, Slezak JM, Jacobsen SJ. Correlates for completion of 3-dose regimen of HPV vaccine in female members of a managed care organization. *Mayo Clin Proc.* 2009;84(10):864-870. doi:10.4065/84.10.864.
  17. Chao C, Velicer C, Slezak JM, Jacobsen SJ. Correlates for Human Papillomavirus Vaccination of Adolescent Girls and Young Women in a Managed Care Organization. *Am J Epidemiol.* 2010;171(3):357-367. doi:10.1093/aje/kwp365.
  18. Chao C, Preciado M, Slezak J, Xu L. A randomized intervention of reminder letter for human papillomavirus vaccine series completion. *J Adolesc Heal.* 2015;56(1):85-90. doi:10.1016/j.jadohealth.2014.08.014.
  19. Chou B, Krill LS, Horton BB, Barat CE, Trimble CL. Disparities in Human Papillomavirus Vaccine Completion Among Vaccine Initiators. *Obstet Gynecol.* 2011;118(1):14-20. doi:10.1097/AOG.0b013e318220ebf3.
  20. Chuang E, Cabrera C, Mak S, Glenn B, Hochman M, Bastani R. Primary care team- and clinic level factors affecting HPV vaccine uptake. *Vaccine.* 2017;35(35):4540-4547. doi:10.1016/j.vaccine.2017.07.028.
  21. Clarke MA, Coutinho F, Phelan-Emrick DF, Wilbur MA, Chou B, Joshi CE. Predictors of human papillomavirus vaccination in a large clinical population of males aged 11 to 26 years in Maryland, 2012-2013. *Cancer Epidemiol Biomarkers Prev.* 2016;25(2):351-358. doi:10.1158/1055-9965.EPI-15-0983.
  22. Conroy K, Rosenthal SL, Zimet GD, et al. Human Papillomavirus Vaccine Uptake, Predictors of Vaccination, and Self-Reported Barriers to Vaccination. *J Women's Heal.* 2009;18(10):1679-1686. doi:10.1089/jwh.2008.1329.
  23. Cook RL, Zhang J, Mullins J, et al. Factors associated with initiation and completion of human papillomavirus vaccine series among young women enrolled in medicaid. *J Adolesc Heal.* 2010;47(6):596-599. doi:10.1016/j.jadohealth.2010.09.015.
  24. Corriero R, Gay JL, Robb SW, Stowe EW. Human Papillomavirus Vaccination Uptake before and after the Affordable Care Act: Variation According to Insurance Status, Race, and Education (NHANES 2006-2014). *J Pediatr Adolesc Gynecol.* July 2017. doi:10.1016/j.jpag.2017.07.002.
  25. Cowburn S, Carlson M, Lapidus J, Heintzman J, Bailey S, DeVoe J. Insurance continuity and human papillomavirus vaccine uptake in Oregon and California federally qualified health centers. *Am J Public Health.* 2014;104(9):71-79. doi:10.2105/AJPH.2014.302007.
  26. Cuff RD, Buchanan T, Pelkofski E, Korte J, Modesitt SP, Pierce JY. Rates of human papillomavirus vaccine uptake amongst girls five years after introduction of statewide mandate in Virginia. *Am J Obstet Gynecol.* 2016;214(6):752.e1-752.e6. doi:10.1016/j.ajog.2016.03.022.
  27. Curtis CR, Yankey D, Jeyarajah J, et al. National and state vaccination coverage among adolescents aged 13-17 years--United States, 2012. *MMWR Morb Mortal Wkly Rep.* 2013;62(34):685-693. <http://www.ncbi.nlm.nih.gov/pubmed/23985496>. Accessed December 19, 2018.

28. Daley EM, Vamos CA, Buhi ER, et al. Influences on Human Papillomavirus Vaccination Status Among Female College Students. *J Women's Heal*. 2010;19(10):1885-1891. doi:10.1089/jwh.2009.1861.
29. Daniel-Ulloa J, Gilbert PA, Parker EA. Human papillomavirus vaccination in the United States: Uneven uptake by gender, race/ethnicity, and sexual orientation. *Am J Public Health*. 2016;106(4):746-747. doi:10.2105/AJPH.2015.303039.
30. De P, Budhwani H. Human papillomavirus (HPV) vaccine initiation in minority Americans. *Public Health*. 2017;144:86-91. doi:10.1016/j.puhe.2016.11.005.
31. Dempsey A, Cohn L, Dalton V, Ruffin M. Patient and clinic factors associated with adolescent human papillomavirus vaccine utilization within a university-based health system. *Vaccine*. 2010;28(4):989-995. doi:10.1016/j.vaccine.2009.10.133.
32. Dempsey A, Cohn L, Dalton V, Ruffin M. Worsening disparities in HPV vaccine utilization among 19-26 year old women. *Vaccine*. 2011;29(3):528-534. doi:10.1016/j.vaccine.2010.10.051.
33. Du P, Camacho F, McCall-Hosenfeld J, Lengerich E, Meyers CM, Christensen ND. Human papillomavirus vaccination among adults and children in 5 US states. *J Public Heal Manag Pract*. 2015;21(6):573-583. doi:10.1097/PHH.0000000000000271.
34. Eberth JM, Hossain MM, Tiro JA, Zhang X, Holt JB, Vernon SW. Human Papillomavirus Vaccine Coverage Among Females Aged 11 to 17 in Texas Counties: An Application of Multilevel, Small Area Estimation. *Women's Heal Issues*. 2013;23(2):e131-41. doi:10.1016/j.whi.2012.12.005.
35. Eberth JM, Zhang X, Hossain M, Tiro JA, Holt JB, Vernon SW. County-level estimates of human papillomavirus vaccine coverage among young adult women in Texas, 2008. *Texas public Heal J*. 2013;65(1):37-40. <http://www.ncbi.nlm.nih.gov/pubmed/24466565>. Accessed December 19, 2018.
36. Elam-Evans LD, Yankey D, Jeyarajah J, et al. National, regional, state, and selected local area vaccination coverage among adolescents aged 13-17 years - United States, 2013. *MMWR Morb Mortal Wkly Rep*. 2014;63(29):625-633. <http://www.ncbi.nlm.nih.gov/pubmed/25055186>. Accessed June 5, 2018.
37. Feemster KA, Middleton M, Fiks AG, Winter S, Kinsman SB, Kahn JA. Does intention to recommend HPV vaccines impact HPV vaccination rates? *Hum Vaccines Immunother*. 2014;10(9):2519-2526. doi:10.4161/21645515.2014.969613.
38. Ford JL. Racial and ethnic disparities in human papillomavirus awareness and vaccination among young adult women. *Public Health Nurs*. 2011;28(6):485-493. doi:10.1111/j.1525-1446.2011.00958.x.
39. Fuller KM, Hinyard L. Factors Associated with HPV Vaccination in Young Males. *J Community Health*. 2017;42(6):1127-1132. doi:10.1007/s10900-017-0361-4.
40. Gerend MA, Madkins K, Phillips G, Mustanski B. Predictors of human papillomavirus vaccination among young men who have sex with men. *Sex Transm Dis*. 2016;43(3):185-191. doi:10.1097/OLQ.0000000000000408.
41. Gilkey MB, Moss JL, McRee AL, Brewer NT. Do correlates of HPV vaccine initiation differ between adolescent boys and girls? *Vaccine*. 2012;30(41):5928-5934. doi:10.1016/j.vaccine.2012.07.045.
42. Gold R, Naleway AL, Jenkins LL, et al. Completion and timing of the three-dose human papillomavirus vaccine series among adolescents attending school-based health centers in Oregon. *Prev Med (Baltim)*. 2011;52(6):456-458. doi:10.1016/j.jpmed.2011.04.010.

43. Gorbach P, Cook R, Gratz B, et al. Human Papillomavirus Vaccination Among Young Men Who Have Sex With Men and Transgender Women in 2 US Cities, 2012-2014. *Sex Transm Dis*. 2017;44(7):436-441. doi:10.1097/OLQ.0000000000000626.Human.
44. Gottlieb SL, Brewer NT, Sternberg MR, et al. Human Papillomavirus Vaccine Initiation in an Area with Elevated Rates of Cervical Cancer. *J Adolesc Heal*. 2009;45(5):430-437. doi:10.1016/j.jadohealth.2009.03.029.
45. Guleria S, Patel AA, Zimmerman L. Completion of a free human papillomavirus vaccination series at an urban, public hospital. *Obstet Gynecol*. 2015;125:113S-114S. doi:10.1016/j.contraception.2015.06.227.
46. Hechter RC, Chao CR, Sidell MA, et al. Quadrivalent Human Papillomavirus Vaccine Initiation in Boys Before and Since Routine Use: Southern California, 2009-2013. *Am J Public Health*. 2015;105(12):2549-2556. doi:10.2105/AJPH.2015.302840.
47. Hoffman L, Okcu MF, Dreyer ZE, Suzawa H, Bryant R, Middleman AB. Human Papillomavirus Vaccination in Female Pediatric Cancer Survivors. *J Pediatr Adolesc Gynecol*. 2012;25(5):305-307. doi:10.1016/j.jpag.2012.05.004.
48. Hofstetter AM, Stockwell MS, Al-Husayni N, et al. HPV vaccination: Are we initiating too late? *Vaccine*. 2014;32(17):1939-1945. doi:10.1016/j.vaccine.2014.01.084.
49. Jain N, Euler GL, Shefer A, Lu P, Yankey D, Markowitz L. Human papillomavirus (HPV) awareness and vaccination initiation among women in the United States, National Immunization Survey-Adult 2007. *Prev Med (Baltim)*. 2009;48(5):426-431. doi:10.1016/j.ypmed.2008.11.010.
50. Johnson KL, Lin M-Y, Cabral H, Kazis LE, Katz IT. Variation in Human Papillomavirus Vaccine Uptake and Acceptability Between Female and Male Adolescents and Their Caregivers. *J Community Health*. 2017;42(3):522-532. doi:10.1007/s10900-016-0284-5.
51. Joseph NP, Clark JA, Mercilus G, Wilbur MA, Figaro J, Perkins R. Racial and ethnic differences in HPV knowledge, attitudes, and vaccination rates among low-income African-American, Haitian, Latina, and Caucasian young adult women. *J Pediatr Adolesc Gynecol*. 2014;27(2):83-92. doi:10.1016/j.jpag.2013.08.011.
52. Kahle EM, Meites E, Sineath RC, et al. Sexually Transmitted Disease Testing and Uptake of Human Papillomavirus Vaccine in a Large Online Survey of US Men Who Have Sex with Men at Risk for HIV Infection, 2012. *Sex Transm Dis*. 2017;44(1):63-67. doi:10.1097/OLQ.0000000000000545.
53. Keenan K, Hipwell A, Stepp S. Race and sexual behavior predict uptake of the human papillomavirus vaccine. *Heal Psychol*. 2012;31(1):31-34. doi:10.1037/a0026812.
54. Kester LM, Zimet GD, Fortenberry JD, Kahn JA, Shew ML. A national study of HPV vaccination of adolescent girls: Rates, predictors, and reasons for non-vaccination. *Matern Child Health J*. 2013;17(5):879-885. doi:10.1007/s10995-012-1066-z.
55. Kharbanda EO, Parker E, Nordin JD, Hedblom B, Rolnick SJ. Receipt of human papillomavirus vaccine among privately insured adult women in a U.S. Midwestern Health Maintenance Organization. *Prev Med (Baltim)*. 2013;57(5):712-714. doi:10.1016/j.ypmed.2013.07.011.
56. Kramer MR, Dunlop AL. Inter-state variation in human papilloma virus vaccine coverage among adolescent girls in the 50 US States, 2007. *Matern Child Health J*. 2012;16(SUPPL. 1):102-110. doi:10.1007/s10995-012-0999-6.
57. Lau M, Lin H, Flores G. Factors associated with human papillomavirus vaccine-series

- initiation and healthcare provider recommendation in US adolescent females: 2007 National Survey of Children's Health. *Vaccine*. 2012;30(20):3112-3118. doi:10.1016/j.vaccine.2012.02.034.
58. Laz TH, Rahman M, Berenson AB. An update on human papillomavirus vaccine uptake among 11-17 year old girls in the United States: National Health Interview Survey, 2010. *Vaccine*. 2012;30(24):3534-3540. doi:10.1016/j.vaccine.2012.03.067.
  59. Laz TH, Rahman M, Berenson AB. Human papillomavirus vaccine uptake among 9–17 year old males in the United States: The National Health Interview Survey, 2010. *Hum Vaccin Immunother*. 2013;9(4):874-878. doi:10.4161/hv.23190.
  60. Laz TH, Rahman M, Berenson AB. Human papillomavirus vaccine uptake among 18- to 26-year-old women in the United States: National Health Interview Survey, 2010. *Cancer*. 2013;119(7):1386-1392. doi:10.1002/cncr.27894.
  61. Lefkowitz ES, Kelly KM, Vasilenko SA, Maggs JL. Correlates of Human Papillomavirus Vaccination Among Female University Students. *Women Health*. 2014;54(6):487-501. doi:10.1080/03630242.2014.903552.
  62. Nuño VL, Gonzalez M, Loredó SM, Nigon BM, Garcia F. A cross-sectional study of human papillomavirus vaccine utilization among university women: The role of ethnicity, race, and risk factors. *J Low Genit Tract Dis*. 2016;20(2):131-134. doi:10.1097/LGT.0000000000000174.
  63. Licht AS, Murphy JM, Hyland AJ, Fix B V., Hawk LW, Mahoney MC. Is use of the human papillomavirus vaccine among female college students related to human papillomavirus knowledge and risk perception? *Sex Transm Infect*. 2010;86(1):74-78. doi:10.1136/sti.2009.037705.
  64. Liddon NC, Leichliter JS, Markowitz LE. Human papillomavirus vaccine and sexual behavior among adolescent and young women. *Am J Prev Med*. 2012;42(1):44-52. doi:10.1016/j.amepre.2011.09.024.
  65. Lindley LL, Elkind JS, Landi SN, Brandt HM. Receipt of the human papillomavirus vaccine among female college students in the United States, 2009. *J Am Coll Heal*. 2013;61(1):18-27. doi:10.1080/07448481.2012.750607.
  66. Lu PJ, Williams WW, Li J, et al. Human papillomavirus vaccine initiation and awareness u.s. young men in the 2010: National health interview survey. *Am J Prev Med*. 2013;44(4):330-338. doi:10.1016/j.amepre.2012.11.027.
  67. Manhart LE, Burgess-Hull AJ, Fleming CB, Bailey JA, Haggerty KP, Catalano RF. HPV vaccination among a community sample of young adult women. *Vaccine*. 2011;29(32):5238-5244. doi:10.1016/j.vaccine.2011.05.024.
  68. Marchand E, Glenn BA, Bastani R. HPV vaccination and sexual behavior in a community college sample. *J Community Health*. 2013;38(6):1010-1014. doi:10.1007/s10900-013-9710-0.
  69. Markovitz AR, Song JY, Paustian ML, El Reda DK. Association between maternal preventive care utilization and adolescent vaccination: It's not just about pap testing. *J Pediatr Adolesc Gynecol*. 2014;27(1):29-36. doi:10.1016/j.jpag.2013.08.012.
  70. McRee AL, Katz ML, Paskett ED, Reiter PL. HPV vaccination among lesbian and bisexual women: Findings from a national survey of young adults. *Vaccine*. 2014;32(37):4736-4742. doi:10.1016/j.vaccine.2014.07.001.
  71. Mehta NR, Julian PJ, Meek JI, et al. Human papillomavirus vaccination history among women with precancerous cervical lesions: Disparities and barriers. *Obstet Gynecol*.

- 2012;119(3):575-581. doi:10.1097/AOG.0b013e3182460d9f.
72. Meites E, Markowitz LE, Paz-Bailey G, et al. HPV vaccine coverage among men who have sex with men - National HIV Behavioral Surveillance System, United States, 2011. *Vaccine*. 2014;32(48):6356-6359. doi:10.1016/j.vaccine.2014.09.033.
  73. Moss JL, Gilkey MB, Reiter PL, Brewer NT. Trends in HPV vaccine initiation among adolescent females in North Carolina, 2008-2010. *Cancer Epidemiol Biomarkers Prev*. 2012;21(11):1913-1922. doi:10.1158/1055-9965.EPI-12-0509.
  74. Nelson EJ, Hughes J, Oakes JM, Pankow JS, Kulasingam SL. Geospatial patterns of human papillomavirus vaccine uptake in Minnesota. *BMJ Open*. 2015;5(8):e008617. doi:10.1136/bmjopen-2015-008617.
  75. Neubrand TPL, Radecki Breitkopf C, Rupp R, Breitkopf D, Rosenthal SL. Factors associated with completion of the human papillomavirus vaccine series. *Clin Pediatr (Phila)*. 2009;48(9):966-969. doi:10.1177/0009922809337534.
  76. Niccolai LM, Mehta NR, Hadler JL. Racial/ethnic and poverty disparities in human papillomavirus vaccination completion. *Am J Prev Med*. 2011. doi:10.1016/j.amepre.2011.06.032.
  77. Okafor C, Hu X, Cook RL. Racial/Ethnic Disparities in HPV Vaccine Uptake Among a Sample of College Women. *J racial Ethn Heal disparities*. 2015;2(3):311-316. doi:10.1007/s40615-014-0074-7.
  78. Oliver SE, Hoots BE, Paz-Bailey G, Markowitz LE, Meites E. Increasing Human Papillomavirus Vaccine Coverage Among Men Who Have Sex With Men-National HIV Behavioral Surveillance, United States, 2014. *J Acquir Immune Defic Syndr*. 2017;75:S370-S374. doi:10.1097/QAI.0000000000001413.
  79. Palli SR, Mehta S, Aparasu RR. Prevalence and predictors of human papillomavirus vaccination in adolescent girls. *J Am Pharm Assoc*. 2012;52(1):52-58. doi:10.1331/JAPhA.2012.10195.
  80. Pathela P, Jamison K, Papadouka V, et al. Measuring Adolescent Human Papillomavirus Vaccine Coverage: A Match of Sexually Transmitted Disease Clinic and Immunization Registry Data. *J Adolesc Heal*. 2016;59(6):710-715. doi:10.1016/j.jadohealth.2016.07.021.
  81. Perkins RB, Brogly SB, Adams WG, Freund KM. Correlates of Human Papillomavirus Vaccination Rates in Low-Income, Minority Adolescents: A Multicenter Study. *J Women's Heal*. 2012;21(8):813-820. doi:10.1089/jwh.2011.3364.
  82. Perkins RB, Zisblatt L, Legler A, Trucks E, Hanchate A, Gorin SS. Effectiveness of a provider-focused intervention to improve HPV vaccination rates in boys and girls. *Vaccine*. 2015;33(9):1223-1229. doi:10.1016/j.vaccine.2014.11.021.
  83. Perry R, Rankin K, Yu MC, Harwood B. Factors associated with human papillomavirus vaccination completion on a catch-up schedule. In: *Obstetrics and Gynecology*. Vol 124. ; 2014:76-81. doi:10.1097/AOG.0000000000000319.
  84. Pierce J, Korte J, Carr L, Gasper C, Modesitt S. Post Approval Human Papillomavirus Vaccine Uptake Is Higher in Minorities Compared to Whites in Girls Presenting for Well-Child Care. *Vaccines*. 2013;1(3):250-261. doi:10.3390/vaccines1030250.
  85. Pierre-Victor D, Mukherjee S, Bahelah R, Madhivanan P. Human papillomavirus vaccine uptake among males 11-26 years in United States: Findings from the national health and nutrition examination survey, 2011-2012. *Vaccine*. 2014;32(49):6655-6658. doi:10.1016/j.vaccine.2014.09.044.

86. Anhang Price R, Tiro JA, Saraiya M, Meissner H, Breen N. Use of human papillomavirus vaccines among young adult women in the United States: An analysis of the 2008 National Health Interview Survey. *Cancer*. 2011;117(24):5560-5568. doi:10.1002/cncr.26244.
87. Pruitt SL, Schootman M. Geographic Disparity, Area Poverty, and Human Papillomavirus Vaccination. *Am J Prev Med*. 2010;38(5):525-533. doi:10.1016/j.amepre.2010.01.018.
88. Reagan-Steiner S, Yankey D, Jeyarajah J, et al. National, Regional, State, and Selected Local Area Vaccination Coverage Among Adolescents Aged 13–17 Years — United States, 2014. Center for Disease Control and Prevention. <https://www.cdc.gov/mmwr/preview/mmwrhtml/mm6429a3.htm>. Published 2015. Accessed June 23, 2017.
89. Reagan-Steiner S, Yankey D, Jeyarajah J, et al. National, Regional, State, and Selected Local Area Vaccination Coverage Among Adolescents Aged 13-17 Years-United States, 2015. *MMWR Morb Mortal Wkly Rep*. 2016;65(33):850-858. doi:10.15585/mmwr.mm6533a4.
90. Reiter PL, McRee AL, Gottlieb SL, Brewer NT. Correlates of receiving recommended adolescent vaccines among adolescent females in North Carolina. *Hum Vaccin*. 2011;7(1):67-73. doi:10.4161/hv.V.I.13500.
91. Reiter PL, Gilkey MB, Brewer NT. HPV vaccination among adolescent males: Results from the National Immunization Survey-Teen. *Vaccine*. 2013;31(26):2816-2821. doi:10.1016/j.vaccine.2013.04.010.
92. Reiter PL, McRee A-L, Katz ML, Paskett ED. Human Papillomavirus Vaccination Among Young Adult Gay and Bisexual Men in the United States. *Am J Public Health*. 2015;105(1):96-102. doi:10.2105/AJPH.2014.302095.
93. Richards MJ, Peters M, Sheeder J. Human Papillomavirus Vaccine: Continuation, Completion, and Missed Opportunities. *J Pediatr Adolesc Gynecol*. 2016;29(2):117-121. doi:10.1016/j.jpag.2015.08.003.
94. Rosenthal SL, Weiss TW, Zimet GD, Ma L, Good MB, Vichnin MD. Predictors of HPV vaccine uptake among women aged 19-26: Importance of a physician's recommendation. *Vaccine*. 2011;29(5):890-895. doi:10.1016/j.vaccine.2009.12.063.
95. Sadigh G, Dempsey AF, Ruffin M, Resnicow K, Carlos RC. National patterns in human papillomavirus vaccination: An analysis of the National Survey of Family Growth. *Hum Vaccin Immunother*. 2012;8(2):234-242. doi:10.4161/hv.18456.
96. Sara Test F, Caskey R, Rankin KM. The relationship between receiving care within a medical home and HPV vaccine receipt for adolescent girls: Results of the 2007 National Survey of Children's Health. *Matern Child Health J*. 2013;17(2):274-281. doi:10.1007/s10995-012-0975-1.
97. Schluterman NH, Terplan M, Lydecker AD, Tracy JK. Human papillomavirus (HPV) vaccine uptake and completion at an urban hospital. *Vaccine*. 2011;29(21):3767-3772. doi:10.1016/j.vaccine.2011.03.032.
98. Schmotzer GL, Reding KW. Knowledge and beliefs regarding human papillomavirus among college nursing students at a minority-serving institution. *J Community Health*. 2013;38(6):1106-1114. doi:10.1007/s10900-013-9720-y.
99. Simons HR, Unger ZD, Lopez PM, Kohn JE. Predictors of human papillomavirus vaccine completion among female and male vaccine initiators in family planning centers. *Am J Public Health*. 2015;105(12):2541-2548. doi:10.2105/AJPH.2015.302834.

100. Small SL, Patel DA. Impact of HPV vaccine availability on uptake. *J Nurse Pract.* 2012;8(1):61-66. doi:10.1016/j.nurpra.2011.06.005.
101. St Sauver JL, Rutten LJF, Ebbert JO, Jacobson DJ, McGree ME, Jacobson RM. Younger age at initiation of the human papillomavirus (HPV) vaccination series is associated with higher rates of on-time completion. *Prev Med (Baltim).* 2016;89:327-333. doi:10.1016/j.ypmed.2016.02.039.
102. Staras SAS, Vadaparampil ST, Patel RP, Shenkman EA. Parent perceptions important for HPV vaccine initiation among low income adolescent girls. *Vaccine.* 2014;32(46):6163-6169. doi:10.1016/j.vaccine.2014.08.054.
103. Sundstrom B, Carr LA, DeMaria AL, Korte JE, Modesitt SC, Pierce JY. Protecting the Next Generation: Elaborating the Health Belief Model to Increase HPV Vaccination Among College-Age Women. *Soc Mar Q.* 2015;21(3):173-188. doi:10.1177/1524500415598984.
104. Tan W, Viera AJ, Rowe-West B, Grimshaw A, Quinn B, Walter EB. The HPV vaccine: Are dosing recommendations being followed? *Vaccine.* 2011;29(14):2548-2554. doi:10.1016/j.vaccine.2011.01.066.
105. Taylor LD, Hariri S, Sternberg M, Dunne EF, Markowitz LE. Human papillomavirus vaccine coverage in the United States, National Health and Nutrition Examination Survey, 2007-2008. *Prev Med (Baltim).* 2011;52(5):398-400. doi:10.1016/j.ypmed.2010.11.006.
106. Taylor JL, Zimet GD, Donahue KL, Alexander AB, Shew ML, Stupiansky NW. Vaccinating sons against HPV: Results from a U.S. national survey of parents. Reiter PL, ed. *PLoS One.* 2014;9(12):e115154. doi:10.1371/journal.pone.0115154.
107. Thomas R, Higgins L, Ding L, Widdice LE, Chandler E, Kahn JA. Factors Associated With HPV Vaccine Initiation, Vaccine Completion, and Accuracy of Self-Reported Vaccination Status Among 13- to 26-Year-Old Men. *Am J Mens Health.* 2016;12(4):819-827. doi:10.1177/1557988316645155.
108. Thompson EL, Vamos CA, Vázquez-Otero C, Logan R, Griner S, Daley EM. Trends and predictors of HPV vaccination among U.S. College women and men. *Prev Med (Baltim).* 2016;86:92-98. doi:10.1016/j.ypmed.2016.02.003.
109. Tiro JA, Pruitt SL, Bruce CM, et al. Multilevel correlates for human papillomavirus vaccination of adolescent girls attending safety net clinics. *Vaccine.* 2012;30(13):2368-2375. doi:10.1016/j.vaccine.2011.11.031.
110. Tiro JA, Tsui J, Bauer HM, Yamada E, Kobrin S, Breen N. Human Papillomavirus Vaccine Use Among Adolescent Girls and Young Adult Women: An Analysis of the 2007 California Health Interview Survey. *J Women's Heal.* 2012;21(6):656-665. doi:10.1089/jwh.2011.3284.
111. Walker TY, Elam-Evans LD, Singleton JA, et al. National, regional, state, and selected local area vaccination coverage among adolescents aged 13--17 years—United States, 2016. *MMWR Morb Mortal Wkly Rep.* 2017;66(33):874.
112. Wei F, Moore PC, Green AL. Geographic variability in human papillomavirus vaccination among U.S. young women. *Am J Prev Med.* 2013;44(2):154-157. doi:10.1016/j.amepre.2012.09.061.
113. Widdice LE, Bernstein DI, Leonard AC, Marsolo KA, Kahn JA. Adherence to the HPV vaccine dosing intervals and factors associated with completion of 3 doses. *Pediatrics.* 2011;127(1):77-84. doi:10.1542/peds.2010-0812.
114. Williams WW, Lu P-J, Saraiya M, et al. Factors associated with human papillomavirus

- vaccination among young adult women in the United States. *Vaccine*. 2013;31(28):2937-2946. doi:10.1016/j.vaccine.2013.04.041.
115. Williams WW, Lu PJ, O'Halloran A, et al. Vaccination coverage among adults, excluding influenza vaccination - United States, 2013. *MMWR Morb Mortal Wkly Rep*. 2015;64(4):95-102. doi:mm6404a6 [pii].
  116. Wilson AR, Hashibe M, Bodson J, et al. Factors related to HPV vaccine uptake and 3-dose completion among women in a low vaccination region of the USA: An observational study. *BMC Womens Health*. 2016;16(1):41. doi:10.1186/s12905-016-0323-5.
  117. Wilson KL, Smith ML, Rosen BL, Pulczynski JC, Ory MG. HPV Vaccination Status and Mandate Support for School-Aged Adolescents Among College Females: A Descriptive Study. *J Sch Nurs*. 2017;33(3):232-245. doi:10.1177/1059840516659764.
  118. Wong CA, Berkowitz Z, Dorell CG, Anhang Price R, Lee J, Saraiya M. Human papillomavirus vaccine uptake among 9- to 17-year-old girls: National Health Interview Survey, 2008. *Cancer*. 2011;117(24):5612-5620. doi:10.1002/cncr.26246.
  119. Sterne JAC, Harbord RM. *Funnel Plots in Meta-Analysis*. Vol 4.; 2004. [http://ageconsearch.umn.edu/bitstream/116233/2/sjart\\_st0061.pdf](http://ageconsearch.umn.edu/bitstream/116233/2/sjart_st0061.pdf). Accessed December 18, 2018.
