# Supplementary material
Source: PubMed Central journal article supplement (PMC6724708)
Supplement: NIHMS1033834-supplement-Supplemental_Figure_2.pdf [file NIHMS1033834-supplement-Supplemental_Figure_2.pdf]

**Supplemental Figure 2. Adjusted Odds Ratio (OR) for Association of Minority Status (Minority vs. White) and HPV Vaccination**

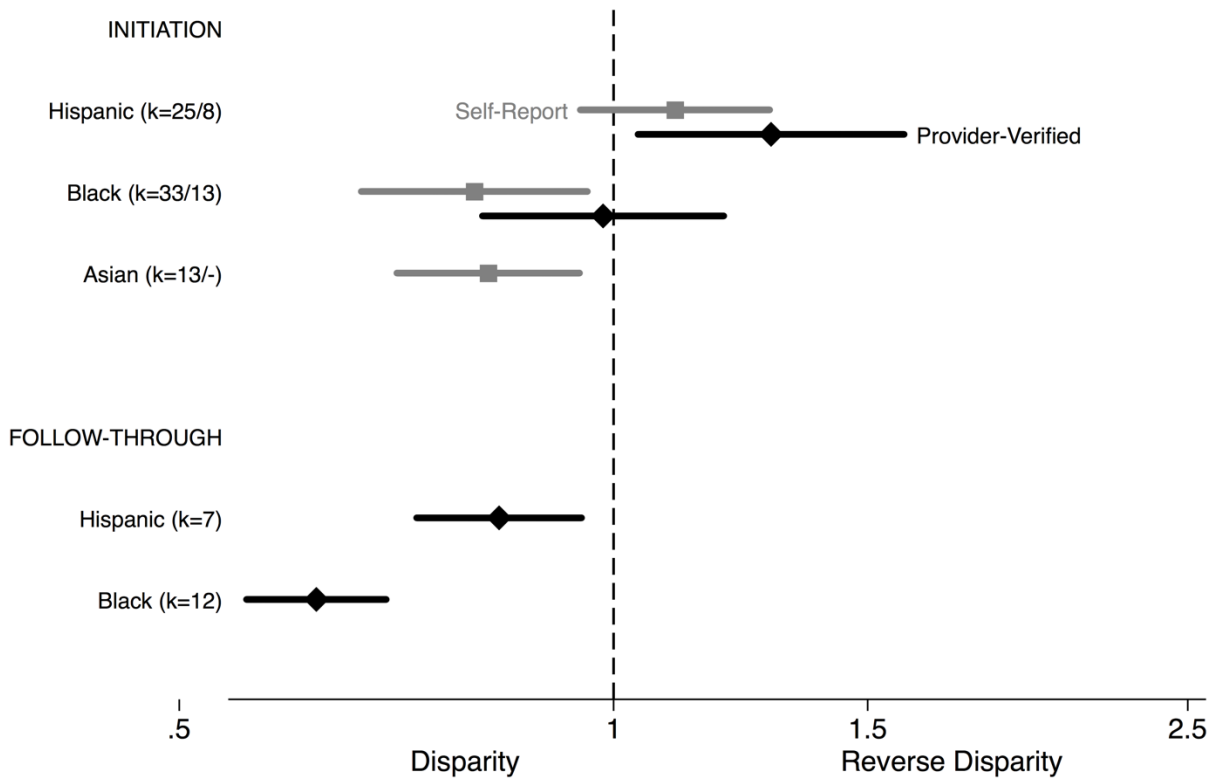

*Note.* OR = odds ratio; Due to high variability and low number of studies, estimates exclude self-report studies of follow-through for Black and Hispanics (k=3) as well as provider-reported estimates of initiation and follow-through for Asian (k=3).
