# Supplementary material
Source: PubMed Central journal article supplement (PMC6724708)
Supplement: NIHMS1033834-supplement-Supplemental_Figure_4.pdf [file NIHMS1033834-supplement-Supplemental_Figure_4.pdf]

**Supplemental Figure 4. Funnel Plot of Effect Sizes (Difference in HPV Vaccination between Minority and White)**

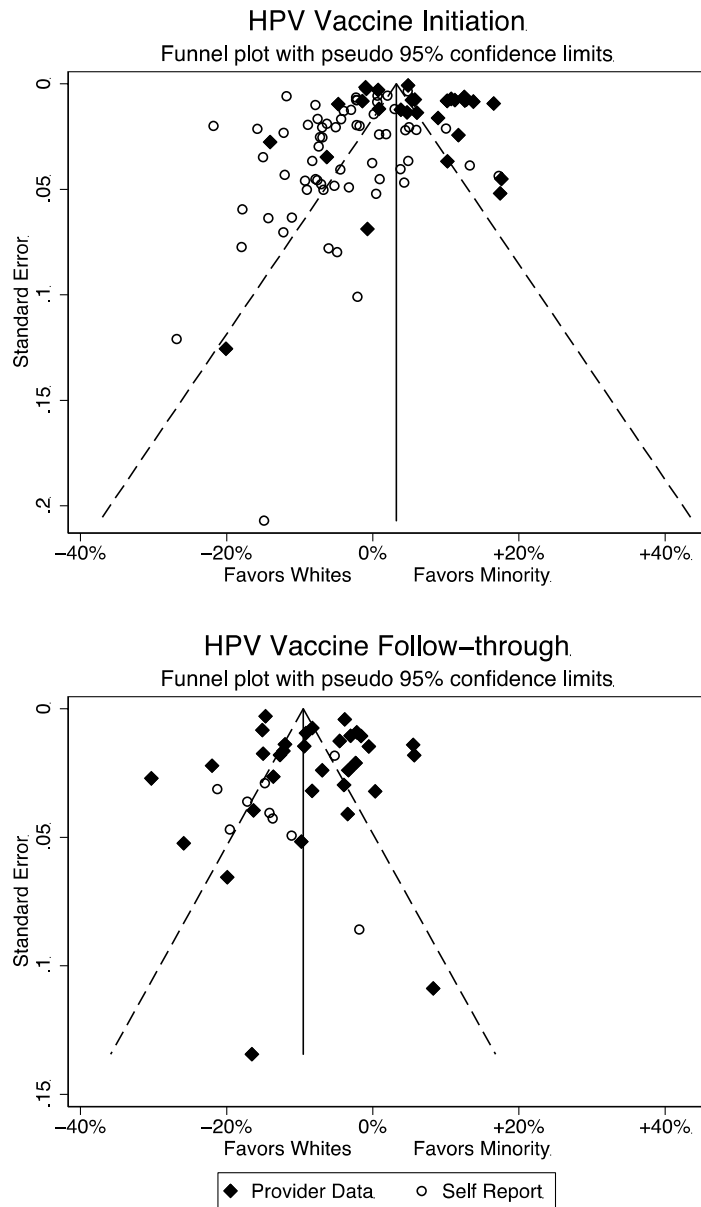

Horizontal line represents the pooled effect size from a fixed effect meta-regression. Dashed lines represent pseudo-confidence intervals as described by Sterne and Harbord.<sup>119</sup>
