# Supplementary material
Source: PubMed Central journal article supplement (PMC6724708)
Supplement: NIHMS1033834-supplement-Supplemental_Table_1.pdf [file NIHMS1033834-supplement-Supplemental_Table_1.pdf]

**Supplemental Table 1: Included Studies**

| Author (year)                     | Sampling of clusters | Sampling of patients | Response rate (%) | Sex (age)   | Source of race and ethnicity data | Race and ethnicity of participants |     |     |     | Hispanic ethnicity reporting | Missingness of race and ethnicity, handling | Source of HPV vaccination data | <i>n</i>   |                | Study design |
|-----------------------------------|----------------------|----------------------|-------------------|-------------|-----------------------------------|------------------------------------|-----|-----|-----|------------------------------|---------------------------------------------|--------------------------------|------------|----------------|--------------|
|                                   |                      |                      |                   |             |                                   | % W                                | % B | % H | % A |                              |                                             |                                | Initiation | Follow-through |              |
| Ackerson <sup>1</sup> (2017)      | Single Site          | Conv                 | NA                | M (9-17)    | Admin                             | 18                                 | 9   | 59  | 8   | Combined                     | 4.3%, own category                          | Provider                       |            | 75,024         | CS           |
| Barboza <sup>2</sup> (2016)       | National             | Prob                 | NR                | M/F (9-17)  | Self                              | 71                                 | 10  | 20  | .   | Combined                     | NR                                          | Self                           | 5,285      | 880            | CS           |
| Bass <sup>3</sup> (2015)          | Regional             | Prob                 | 71                | M/F (14-18) | Self                              | 16                                 | 56  | .   | 7   | NA                           | NR                                          | Self                           | 764        |                | CS           |
| Bednarczyk <sup>4</sup> (2011)    | Single Site          | Conv                 | 66                | F (18+)     | Self                              | 62                                 | 10  | 11  | 8   | Combined                     | 8%, excluded                                | Self                           | 538        |                | CS           |
| Bendik <sup>5</sup> (2011)        | Single Site          | Conv                 | 31                | F (18-24)   | Self                              | 86                                 | 5   | 1   | 2   | Combined                     | NR                                          | Self                           | 1,957      |                | CS           |
| Berenson <sup>6</sup> (2016)      | Single Site          | Conv                 | NA                | F (9-26)    | Admin                             | 25                                 | 21  | 53  | .   | Combined                     | NR                                          | Provider                       | 739        | 575            | CS           |
| Bernat <sup>7</sup> (2013)        | National             | Prob                 | NR                | M/F (18-24) | Self                              | 76                                 | 5   | 8   | 12  | Separate                     | NR                                          | Self                           | 2,870      |                | CS           |
| Blumenthal <sup>8</sup> (2012)    | Single Site          | Conv                 | NR                | M/F (13-18) | Self                              | 8                                  | 21  | 65  | 1   | Combined                     | 0.9%, excluded                              | Self                           | 194        |                | CS           |
| Brewer <sup>9</sup> (2011)        | Regional             | Prob                 | 73                | F (10-18)   | Self                              | 56                                 | 35  | .   | .   | NA                           | NR                                          | Self                           | 567        |                | L            |
| Caskey <sup>10</sup> (2009)       | National             | Prob                 | 47                | F (13-26)   | Self                              | 63                                 | 17  | 13  | .   | Combined                     | NR                                          | Self                           | 933        |                | CS           |
| CDC <sup>11</sup> (2009) NIS-Teen | National             | Prob                 | 60                | F (11-17)   | Self                              | 70                                 | 10  | 12  | 2   | Combined                     | NR, imputed                                 | Provider                       | 7,987      |                | CS           |
| CDC <sup>12</sup> (2010) NIS-Teen | National             | Prob                 | 58                | F (11-17)   | Self                              | 70                                 | 10  | 12  | 2   | Combined                     | NR, imputed                                 | Provider                       | 9,116      | 3,759          | CS           |
| CDC <sup>13</sup> (2011) NIS-Teen | National             | Prob                 | 58                | F (11-17)   | Self                              | 69                                 | 10  | 13  | 3   | Combined                     | NR, imputed                                 | Provider                       | 17,918     | 3,974          | CS           |

|                                            |             |      |    |                |       |    |    |    |   |          |                   |          |         |        |    |
|--------------------------------------------|-------------|------|----|----------------|-------|----|----|----|---|----------|-------------------|----------|---------|--------|----|
| CDC <sup>14</sup><br>(2012)<br>NIS-Teen    | National    | Prob | 57 | M/F<br>(11-17) | Self  | 71 | 11 | 14 | 3 | Combined | NR, imputed       | Provider | 18,032  | 5,559  | CS |
| Chao <sup>15</sup><br>(2009a)              | Single Site | Conv | NA | F<br>(9-26)    | Admin | 22 | 10 | 37 | 6 | Combined | Included in other | Provider | 112,841 |        | CS |
| Chao <sup>16</sup><br>(2009b)              | Single Site | Conv | NA | F<br>(9-26)    | Admin | 18 | 7  | 29 | 3 | Combined | NR                | Provider |         | 16,512 | CS |
| Chao <sup>17</sup><br>(2010)               | Single Site | Conv | NA | F<br>(9-26)    | Admin | 19 | 8  | 44 | 6 | Combined | 50%, imputed      | Provider | 219,314 |        | CS |
| Chao <sup>18</sup><br>(2015)               | Single Site | Prob | NA | F<br>(9-26)    | Admin | 24 | 9  | 50 | 9 | Combined | Included in other | Provider |         | 2,251  | CS |
| Chou <sup>19</sup><br>(2011)               | Single Site | Conv | NA | F<br>(11-26)   | Admin | 52 | 31 | 4  | . | Combined | 9%, excluded      | Provider |         | 1,227  | CS |
| Chuang <sup>20</sup><br>(2017)             | Regional    | Conv | NA | M/F<br>(9-18)  | Admin | 7  | 3  | 83 | 3 | Combined | NR                | Provider | 36,822  | 16,690 | CS |
| Clarke <sup>21</sup><br>(2016)             | Single Site | Conv | NA | M<br>(11-26)   | Self  | 51 | 35 | 5  | 3 | Combined | NR                | Provider | 13,733  | 632    | CS |
| Conroy <sup>22</sup><br>(2009)             | Single Site | Conv | 72 | F<br>(13-26)   | Admin | 15 | 79 | .  | . | NA       | NR                | Self     | 173     |        | L  |
| Cook <sup>23</sup><br>(2010)               | Regional    | Conv | NA | F<br>(9-20)    | Admin | 28 | 38 | 25 | . | Combined | NR                | Provider | 151,978 | 14,155 | CS |
| Corriero <sup>24</sup><br>(2017)           | National    | Prob | NR | F<br>(9-33)    | Self  | 70 | 17 | 13 | . | Combined | NR                | Self     | 4,449   | 916    | CS |
| Cowburn <sup>25</sup><br>(2014)            | Regional    | Conv | NA | F<br>(9-26)    | Self  | 39 | .  | 35 | 7 | Combined | 23%, excluded     | Provider | 12,119  | 2,234  | CS |
| Cuff <sup>26</sup><br>(2016)               | Regional    | Conv | NA | F<br>(11-12)   | Admin | 75 | 16 | .  | . | NA       | NR                | Self     | 824     |        | CS |
| Curtis <sup>27</sup><br>(2013)<br>NIS-Teen | National    | Prob | 54 | M/F<br>(11-17) | Self  | 68 | 10 | 13 | 3 | Combined | NR, imputed       | Provider | 18,032  | 5,559  | CS |
| Daley <sup>28</sup><br>(2010)              | Single Site | Conv | 90 | F<br>(17-42)   | Self  | 85 | .  | 18 | . | Separate | NR                | Self     | 255     |        | CS |
| DanielUlloa <sup>29</sup><br>(2016)        | National    | Prob | NA | M/F<br>(18-30) | Self  | 52 | 15 | 22 | . | Combined | NR                | Self     | 5,794   | 1,062  | CS |

|                                                |             |      |    |                |       |    |    |    |   |          |                   |          |        |       |    |
|------------------------------------------------|-------------|------|----|----------------|-------|----|----|----|---|----------|-------------------|----------|--------|-------|----|
| De <sup>30</sup><br>(2017)                     | National    | Prob | NA | M/F<br>(18-26) | Self  | 77 | 15 | .  | 3 | Combined | NR                | Self     | 34,557 |       | CS |
| Dempsey <sup>31</sup><br>(2010)                | Single Site | Conv | NA | F<br>(9-18)    | Self  | 73 | 14 | .  | . | NA       | Included in other | Provider | 8,771  | 2,532 | CS |
| Dempsey <sup>32</sup><br>(2011)                | Single Site | Conv | NA | F<br>(19-26)   | Admin | 76 | 11 | .  | . | NA       | Included in other | Provider | 10,036 | 1,839 | CS |
| Du <sup>33</sup><br>(2015)                     | Regional    | Prob | NR | F<br>(9-26)    | Self  | 66 | 6  | 23 | . | Combined | NR                | Self     | 2,093  | 591   | CS |
| Eberth <sup>34</sup><br>(2013a)                | Regional    | Prob | NR | F<br>(11-17)   | Self  | 54 | .  | 33 | . | Combined | NR, excluded      | Self     | 574    |       | CS |
| Eberth <sup>35</sup><br>(2013b)                | Regional    | Prob | NR | F<br>(18-26)   | Self  | 43 | 8  | 38 | . | Combined | NR, excluded      | Self     | 277    |       | CS |
| Elam-Evans <sup>36</sup><br>(2014)<br>NIS-Teen | National    | Prob | 47 | M/F<br>(11-17) | Self  | 68 | 10 | 14 | 3 | Combined | NR, imputed       | Provider | 17,013 | 6,616 | CS |
| Feemster <sup>37</sup><br>(2014)               | Single Site | Conv | NA | F<br>(11-18)   | Admin | 58 | 28 | 2  | . | Combined | Included in other | Provider | 16,138 |       | L  |
| Ford <sup>38</sup><br>(2011)                   | National    | Prob | 76 | F<br>(18-24)   | Self  | 66 | 16 | 18 | . | Combined | NR                | Self     | 1,019  |       | CS |
| Fuller <sup>39</sup><br>(2017)                 | Regional    | Prob | NR | M<br>(18-26)   | Self  | 69 | 9  | 12 | . | Combined | NR                | Self     | 1,459  |       | CS |
| Gerend <sup>40</sup><br>(2016)                 | National    | Conv | 61 | M<br>(18-26)   | Self  | 57 | 7  | 23 | . | Combined | NR                | Self     | 265    |       | CS |
| Gilkey <sup>41</sup><br>(2012)                 | Regional    | Prob | 63 | M/F<br>(11-17) | Self  | 73 | 16 | .  | . | Combined | NR                | Self     | 669    |       | CS |
| Gold <sup>42</sup><br>(2011)                   | Regional    | Conv | NA | F<br>(8-17)    | Admin | 55 | 11 | 22 | . | Combined | 4%, excluded      | Provider |        | 395   | CS |
| Gorbach <sup>43</sup><br>(2017)                | Single Site | Conv | 95 | M<br>(18-26)   | Self  | 27 | 18 | 38 | 7 | Combined | NR                | Self     | 729    |       | CS |
| Gottlieb <sup>44</sup><br>(2009)               | Regional    | Prob | NR | F<br>(10-18)   | Self  | 52 | 38 | 5  | . | Combined | NR                | Self     | 855    |       | CS |
| Guleria <sup>45</sup><br>(2016)                | Single Site | Conv | NA | F<br>(14-26)   | Self  | 8  | 67 | 17 | . | Combined | NR                | Provider |        | 190   | CS |

|                                    |             |      |    |                |       |    |    |    |    |          |                      |          |         |       |    |
|------------------------------------|-------------|------|----|----------------|-------|----|----|----|----|----------|----------------------|----------|---------|-------|----|
| Hechter <sup>46</sup><br>(2015)    | Single Site | Conv | NA | M<br>(9-17)    | Admin | 19 | 8  | 35 | 7  | Combined | 16%, own<br>category | Provider | 688,567 |       | CS |
| Hoffman <sup>47</sup><br>(2012)    | Single Site | Conv | 38 | F<br>(11-18)   | Self  | 47 | 9  | 35 | 5  | Combined | NR                   | Self     | 57      |       | CS |
| Hofstetter <sup>48</sup><br>(2014) | Single Site | Conv | NA | F<br>(11-26)   | Admin | 23 | 8  | .  | .  | Separate | 1%, excluded         | Provider |         |       | CS |
| Jain <sup>49</sup><br>(2009)       | National    | Prob | NR | F<br>(18-26)   | Self  | 30 | 20 | 42 | .  | Combined | NR                   | Self     | 154     |       | CS |
| Johnson <sup>50</sup><br>(2017)    | National    | Prob | 54 | M/F<br>(11-17) | Self  | 55 | 22 | 14 |    | Combined | NR, imputed          | Provider | 13,563  | 8,175 | CS |
| Joseph <sup>51</sup><br>(2014)     | Single Site | Conv | NR | F<br>(18-22)   | Self  | 15 | 34 | 15 | .  | Combined | NR                   | Provider | 91      | 71    | CS |
| Kahle <sup>52</sup><br>(2017)      | National    | Conv | 79 | M<br>(18+)     | Self  | 79 | 4  | 10 | .  | Combined | NR                   | Self     | 2,577   |       | CS |
| Keenan <sup>53</sup><br>(2012)     | Regional    | Prob | 85 | F<br>(13-17)   | Self  | 49 | 51 | .  | .  | NA       | NR                   | Self     | 2,057   |       | L  |
| Kester <sup>54</sup><br>(2013)     | National    | Prob | 81 | F<br>(14-17)   | Self  | 59 | 14 | 22 | .  | Combined | NR                   | Self     | 469     |       | CS |
| Kharbanda <sup>55</sup><br>(2013)  | Single Site | Conv | NA | F<br>(18-26)   | Self  | 83 | 6  | 2  | 6  | Combined | NR                   | Provider | 2,464   | 1,798 | CS |
| Kramer <sup>56</sup><br>(2012)     | National    | Prob | NR | F<br>(12-17)   | Self  | 70 | 10 | 7  | .  | Combined | NR                   | Self     | 14,931  | 2,759 | CS |
| Lau <sup>57</sup><br>(2012)        | National    | Prob | NR | F<br>(12-17)   | Self  | 59 | 17 | 18 | 3  | Combined | NR                   | Self     | 15,901  |       | CS |
| Laz <sup>58</sup><br>(2012)        | National    | Prob | 71 | F<br>(11-17)   | Self  | 43 | 18 | 30 | 6  | Combined | NR                   | Self     | 2,096   | 599   | CS |
| Laz <sup>59</sup><br>(2013a)       | National    | Prob | NR | M<br>(9-17)    | Self  | 45 | 17 | 29 | 5  | Combined | NR                   | Self     | 2,786   |       | CS |
| Laz <sup>60</sup><br>(2013b)       | National    | Prob | NR | F<br>(18-26)   | Self  | 49 | 20 | 24 | .  | Combined | NR                   | Self     | 1,892   | 410   | CS |
| Lefkowitz <sup>61</sup><br>(2014)  | Single Site | Prob | 73 | F<br>(17-20)   | Self  | 20 | 25 | 28 | 27 | Combined | NR                   | Self     | 313     |       | L  |

|                                     |             |      |    |                |       |    |    |    |    |          |                   |          |        |        |    |
|-------------------------------------|-------------|------|----|----------------|-------|----|----|----|----|----------|-------------------|----------|--------|--------|----|
| Leybas Nuno <sup>62</sup><br>(2016) | Single Site | Conv | NR | F<br>(18-26)   | Self  | 56 | 4  | 25 | 9  | Combined | NR                | Self     | 508    |        | CS |
| Licht <sup>63</sup><br>(2010)       | Single Site | Conv | NR | F<br>(18-26)   | Self  | 79 | 5  | 5  | 9  | Separate | NR                | Self     | 395    |        | CS |
| Liddon <sup>64</sup><br>(2012)      | National    | Prob | 76 | F<br>(15-24)   | Self  | 60 | 18 | 18 | .  | Combined | NR                | Self     | 1,197  |        | CS |
| Lindley <sup>65</sup><br>(2013)     | Regional    | Prob | 30 | F<br>(18-24)   | Self  | 77 | 6  | 6  | 10 | Combined | NR                | Self     | 39,948 |        | CS |
| Lu <sup>66</sup><br>(2013)          | National    | Prob | 61 | M<br>(18-26)   | Self  | 61 | 14 | 20 | 3  | Combined | NR                | Self     | 1,593  |        | CS |
| Manhart <sup>67</sup><br>(2011)     | Single Site | Prob | 87 | F<br>(22)      | Self  | 82 | 4  | 4  | 7  | Combined | NR                | Self     | 416    |        | L  |
| Marchand <sup>68</sup><br>(2013)    | Single Site | Conv | NR | F<br>(18-26)   | Self  | 1  | 31 | 59 | 2  | Combined | Included in other | Self     | 106    |        | CS |
| Markovitz <sup>69</sup><br>(2014)   | Regional    | Conv | NA | F<br>(13-17)   | Admin | 90 | 5  | 3  | 2  | Combined | NR, excluded      | Provider | 38,293 | 13,584 | CS |
| McRee <sup>70</sup><br>(2014)       | National    | Conv | 50 | F<br>(18-26)   | Self  | 68 | 10 | 14 | .  | Combined | NR                | Self     | 498    |        | CS |
| Mehta <sup>71</sup><br>(2012)       | Regional    | Conv | 59 | F<br>(18-27)   | Self  | 77 | 14 | 17 | .  | Combined | NR                | Self     | 272    |        | CS |
| Meites <sup>72</sup><br>(2014)      | National    | Prob | NR | M<br>(18-26)   | Self  | 36 | 25 | 30 | .  | Combined | NR                | Self     | 2,949  |        | CS |
| Moss <sup>73</sup><br>(2012)        | Regional    | Prob | NR | F<br>(11-17)   | Self  | 64 | 21 | .  | .  | NA       | NR                | Self     | 1,253  |        | CS |
| Nelson <sup>74</sup><br>(2015)      | Regional    | Conv | NR | M/F<br>(18-30) | Self  | 85 | 5  | 4  | 6  | Separate | NR                | Self     | 751    |        | CS |
| Neubrand <sup>75</sup><br>(2009)    | Single Site | Conv | NA | F<br>(9-21)    | Admin | 59 | 21 | 19 | .  | Combined | <2%, excluded     | Provider |        | 351    | CS |
| Niccolai <sup>76</sup><br>(2011)    | National    | Prob | 58 | F<br>(11-17)   | Self  | 58 | 15 | 19 |    | Combined | NR, imputed       | Provider |        | 7,606  | CS |
| Okafor <sup>77</sup><br>(2015)      | Single Site | Conv | NR | F<br>(18-26)   | Self  | 51 | 16 | 14 | 8  | Combined | NR                | Self     | 751    | 406    | CS |

|                                                        |             |      |    |                |       |    |    |    |   |          |                               |          |        |        |    |
|--------------------------------------------------------|-------------|------|----|----------------|-------|----|----|----|---|----------|-------------------------------|----------|--------|--------|----|
| Oliver <sup>78</sup><br>(2017)                         | National    | Conv | NR | M<br>(18-26)   | Self  | 26 | 34 | 31 | . | Combined | <1%,<br>excluded              | Self     | 2,616  |        | CS |
| Palli <sup>79</sup><br>(2012)                          | National    | Prob | 47 | F<br>(12-17)   | Self  | 71 | .  | 14 | . | Separate | NR                            | Self     | 12,803 |        | CS |
| Pathela <sup>80</sup><br>(2016)                        | Regional    | Conv | NA | M/F<br>(13-18) | Admin | 3  | 61 | 29 | 2 | Combined | NR                            | Provider | 12,803 | 6,172  | CS |
| Perkins <sup>81</sup><br>(2012)                        | Single Site | Conv | NR | F<br>(11-21)   | Admin | 13 | 61 | 15 | . | Combined | NR                            | Provider | 6,831  | 2,729  | CS |
| Perkins <sup>82</sup><br>(2015)                        | Single Site | Conv | NA | M/F<br>(11-21) | Admin | 8  | 47 | 13 | 4 | Combined | NR                            | Provider | 13,118 |        | CS |
| Perry <sup>83</sup><br>(2014)                          | Single Site | Conv | NA | F<br>(13-26)   | Admin | 20 | 55 | 19 | 7 | Combined | NR                            | Provider |        | 310    | CS |
| Pierce <sup>84</sup><br>(2013)                         | Single Site | Conv | NR | F<br>(11-12)   | Self  | 72 | 21 | .  | . | Combined | NR                            | Provider | 511    |        | L  |
| Pierre-<br>Victor <sup>85</sup><br>(2014)              | National    | Prob | 73 | F<br>(11-26)   | Self  | 27 | 29 | 25 | . | Combined | NR                            | Self     | 814    |        | CS |
| Price <sup>86</sup><br>(2010)                          | National    | Prob | 63 | F<br>(18-26)   | Self  | 60 | 15 | 17 | 5 | Combined | NR                            | Self     | 1,468  |        | CS |
| Pruitt <sup>87</sup><br>(2010)                         | National    | Prob | NR | F<br>(13-17)   | Self  | 71 | 9  | 13 |   | Combined | 0.3%,<br>included in<br>other | Self     | 1,709  |        | CS |
| Reagan-<br>Steiner <sup>88</sup><br>(2015)<br>NIS-Teen | National    | Prob | 47 | M/F<br>(11-17) | Self  | 65 | 10 | 16 | 4 | Combined | NR, imputed                   | Provider | 19,448 | 8,934  | CS |
| Reagan-<br>Steiner <sup>89</sup><br>(2016)<br>NIS-Teen | National    | Prob | 37 | M/F<br>(11-17) | Self  | 59 | 10 | 21 | 3 | Combined | NR, imputed                   | Provider | 20,424 | 10,855 | CS |
| Reiter <sup>90</sup><br>(2011)                         | Regional    | Prob | NR | F<br>(11-20)   | Self  | 74 | 20 | .  | . | Combined | NR                            | Self     | 610    |        | L  |
| Reiter <sup>91</sup><br>(2013)                         | National    | Prob | 58 | M<br>(11-17)   | Self  | 58 | 14 | 19 |   | Combined | NR, imputed                   | Provider | 22,365 |        | CS |

|                                     |             |      |    |                |       |    |    |    |    |          |                                                |          |        |         |    |
|-------------------------------------|-------------|------|----|----------------|-------|----|----|----|----|----------|------------------------------------------------|----------|--------|---------|----|
| Reiter <sup>92</sup><br>(2015)      | National    | Prob | NR | M<br>(18-26)   | Self  | 64 | 7  | 18 | .  | Combined | NR                                             | Self     | 380    |         | CS |
| Richards <sup>93</sup><br>(2016)    | Single Site | Conv | NA | F<br>(18-24)   | Admin | 29 | 16 | 30 |    | Combined | NR                                             | Provider |        | 909     | CS |
| Rosenthal <sup>94</sup><br>(2011)   | National    | Prob | 19 | F<br>(19-26)   | Self  | 84 | 3  | 8  |    | Combined | NR, excluded                                   | Provider | 501    |         | CS |
| Sadigh <sup>95</sup><br>(2012)      | National    | Prob | NR | F<br>(9-18)    | Self  | 52 | 23 | 25 | .  | Combined | NR                                             | Self     | 444    |         | CS |
| Sara Test <sup>96</sup><br>(2013)   | National    | Conv | NR | F<br>(12-17)   | Self  | 71 | 10 | 10 | .  | Combined | 1.5%, own category                             | Self     | 14,475 |         | CS |
| Schluterman <sup>97</sup><br>(2011) | Single Site | Conv | NR | F<br>(9-26)    | Admin | 19 | 68 | .  | .  | Combined | 11%, excluded                                  | Provider | 6,957  | 2,542   | CS |
| Schmotzer <sup>98</sup><br>(2013)   | Single Site | Conv | NR | F<br>(18-54)   | Self  | 50 |    | 50 |    | Combined | NR                                             | Self     | 201    |         | CS |
| Simons <sup>99</sup><br>(2015)      | Regional    | Conv | NA | M/F<br>(11-26) | Admin | 38 | 8  | 33 | 11 | Combined | 4%, excluded                                   | Provider |        | 7,301   | CS |
| Small <sup>100</sup><br>(2012)      | Single Site | Conv | NA | F<br>(19-26)   | Admin | 63 | 22 | 8  | 2  | Separate | NR                                             | Provider | 145    |         | L  |
| St. Sauver <sup>101</sup><br>(2016) | Single Site | Conv | NA | M/F<br>(9-27)  | Admin | 78 | 7  | .  | 5  | NA       | Included in other                              | Provider |        | 2,134   | CS |
| Staras <sup>102</sup><br>(2014)     | Regional    | Prob | 43 | F<br>(9-17)    | Self  | 40 | 24 | 36 | .  | Combined | 2%, used Medicaid files if self report missing | Self     | 1,995  |         | CS |
| Sundstrom <sup>103</sup><br>(2015)  | Single Site | Conv | 31 | F<br>(18-26)   | Self  | 77 | 7  | 2  | .  | Combined | 7%, excluded                                   | Self     | 410    |         | CS |
| Tan <sup>104</sup><br>(2011)        | Regional    | Conv | NA | F<br>(9-26)    | Admin | 63 | 33 | 9  | 1  | Separate | 18%, own category                              | Provider |        | 118,865 | CS |
| Taylor <sup>105</sup><br>(2011)     | National    | Prob | 75 | F<br>(9-26)    | Self  | 32 | 27 | 24 |    | Combined | NR                                             | Self     | 827    |         | CS |
| Taylor <sup>106</sup><br>(2014)     | National    | Prob | NR | M<br>(11-17)   | Self  | 74 | 10 | 10 | 4  | Combined | NR                                             | Self     | 737    |         | CS |

|                                             |             |      |    |                |       |    |    |    |    |          |             |          |         |        |    |
|---------------------------------------------|-------------|------|----|----------------|-------|----|----|----|----|----------|-------------|----------|---------|--------|----|
| Thomas <sup>107</sup><br>(2016)             | Single Site | Conv | 91 | M<br>(13-26)   | Self  | 23 | 69 | 3  | .  | Separate | NR          | Provider | 367     |        | CS |
| Thompson <sup>108</sup><br>(2016)           | National    | Prob | 30 | M/F<br>18-26)  | Self  | 68 | 6  | 7  | 8  | Combined | NR          | Self     | 101,020 |        | CS |
| Tiro <sup>109</sup><br>(2012a)              | Regional    | Conv | NR | F<br>(11-18)   | Admin | 9  | 41 | 45 | .  | Combined | NR          | Provider | 700     |        | CS |
| Tiro <sup>110</sup><br>(2013b)              | Regional    | Prob | 18 | F<br>(12-27)   | Self  | 40 | 5  | 43 | 11 | Combined | NR          | Self     | 3,708   |        | CS |
| Walker <sup>111</sup><br>(2017)<br>NIS-Teen | National    | Prob | 33 | M/F<br>(11-17) | Self  | 63 | 10 | 16 | 4  | Combined | NR, imputed | Provider | 18,958  | 10,600 | CS |
| Wei <sup>112</sup><br>(2013)                | National    | Prob | NR | F<br>(18-26)   | Self  | 51 | 18 | 24 | 6  | Combined | NR          | Self     | 1,867   |        | CS |
| Widdice<br>(2011) <sup>113</sup>            | Single Site | Conv | NA | F<br>(9-26)    | Admin | 29 | 67 |    |    | NA       | NR          | Provider |         | 3,175  | CS |
| Williams <sup>114</sup><br>(2013)           | National    | Prob | NR | F<br>(19-26)   | Self  | 50 | 18 | 22 | 7  | Combined | NR          | Self     | 2,104   |        | CS |
| Williams <sup>115</sup><br>(2015)           | National    | Prob | 61 | F<br>(19-26)   | Self  | 52 | 17 | 22 | 6  | Combined | NR          | Self     | 2,007   |        | CS |
| Wilson <sup>116</sup><br>(2016)             | Single Site | Conv | 17 | F<br>(18-26)   | Self  | 81 | 2  | 7  | 5  | Combined | NR          | Self     | 310     | 194    | CS |
| Wilson <sup>117</sup><br>(2017)             | Single Site | Conv | 5  | F<br>(18-26)   | Self  | 76 | 2  | 15 | 3  | Combined | NR          | Self     | 1,069   |        | CS |
| Wong <sup>118</sup><br>(2011)               | National    | Prob | 72 | F<br>(9-17)    | Self  | 47 | 17 | 25 | 6  | Combined | NR          | Self     | 1,636   |        | CS |

Notes. Conv=Convenience sample, Prob= Probability sample, NA= Not applicable, NR= Not Reported, M=Male, F= Female, Admin= Administrative Data, Self=Self-reported data, W=White participants, B=Black/African American participants, H=Hispanic/Latino Participants, A= Asian Participants. Those reporting another race or ethnicity are not included, therefore totals may not add up to 100. Provider= Provider-verified from medical record, immunization registry, or claims, Self=self-reported or parent-reported. Sample size represents number of individuals included in at least one meta-analysis (unadjusted, adjusted, or both). CS= Cross-sectional, L=Longitudinal
