# Supplementary material
Source: PubMed Central journal article supplement (PMC6724708)
Supplement: NIHMS1033834-supplement-Supplemental_Table_2.pdf [file NIHMS1033834-supplement-Supplemental_Table_2.pdf]

**Supplemental Table 2: Multivariate Meta-Regression of Effect Size (Difference in HPV Vaccine Initiation between Minority and White)**

| <b>Correlate</b>        |                   | <b>Initiation (k=94)</b> | <b>Follow-through (k=42)</b> |
|-------------------------|-------------------|--------------------------|------------------------------|
|                         |                   | RD [95% CI]              | RD [95% CI]                  |
| Year of Data Collection |                   | 0.3% [-0.4%,1.1%]        | <b>1.2% [-0.2%,2.5%]</b>     |
| Sex                     |                   |                          |                              |
| (ref: Female only)      | Includes Males    | <b>5.1% [1.4%,8.9%]</b>  | 2.1% [-5.2%,9.3%]            |
| Age                     |                   |                          |                              |
| (ref: Includes 18+)     | Under 17 Only     | <b>4.4% [1.6%,7.2%]</b>  | 0.5% [-4.0%,5.1%]            |
| Data Source             |                   |                          |                              |
| (ref: Self-Report)      | Provider Verified | <b>7.5% [4.7%,10.3%]</b> | 4.4% [1.6%, 10.4%]           |

*Note.* Effect size is the difference in HPV vaccine initiation between minority and white. Negative numbers indicate a disparity, minorities had lower HPV vaccination coverage than whites; positive numbers indicate a reverse disparity.
