# Supplementary material
Source: PubMed Central journal article supplement (PMC6724708)

**Supplemental Figure 1. Difference in HPV Vaccine Initiation between Minority and White**

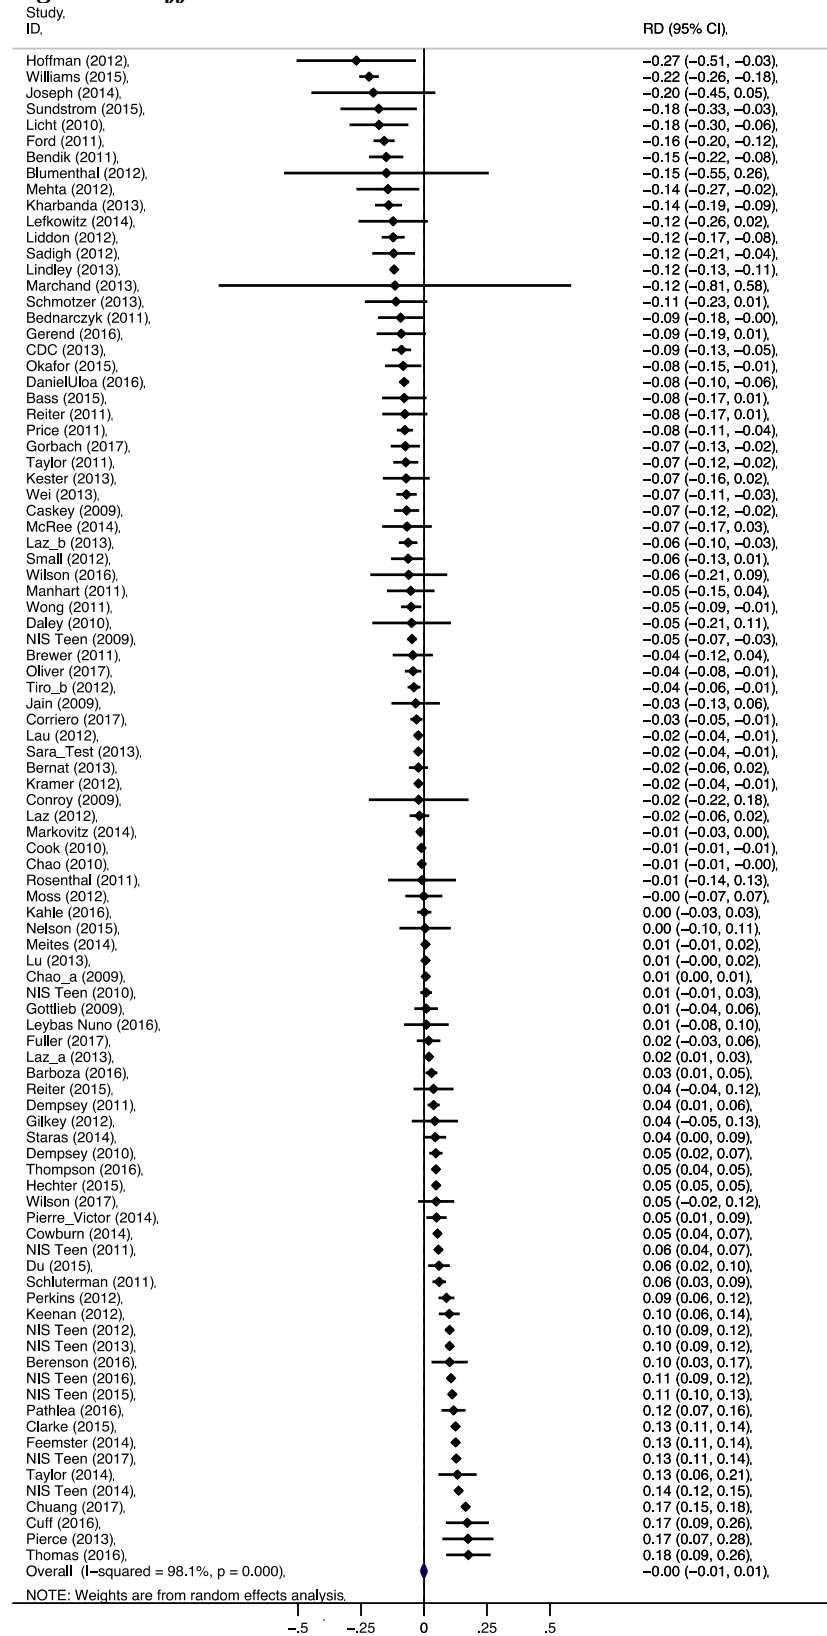

Supplement: NIHMS1033834-supplement-Supplemental_Figure_1.pdf [file NIHMS1033834-supplement-Supplemental_Figure_1.pdf]

**Supplemental Figure 3. Difference in HPV Vaccine Follow-through between Minority and White**

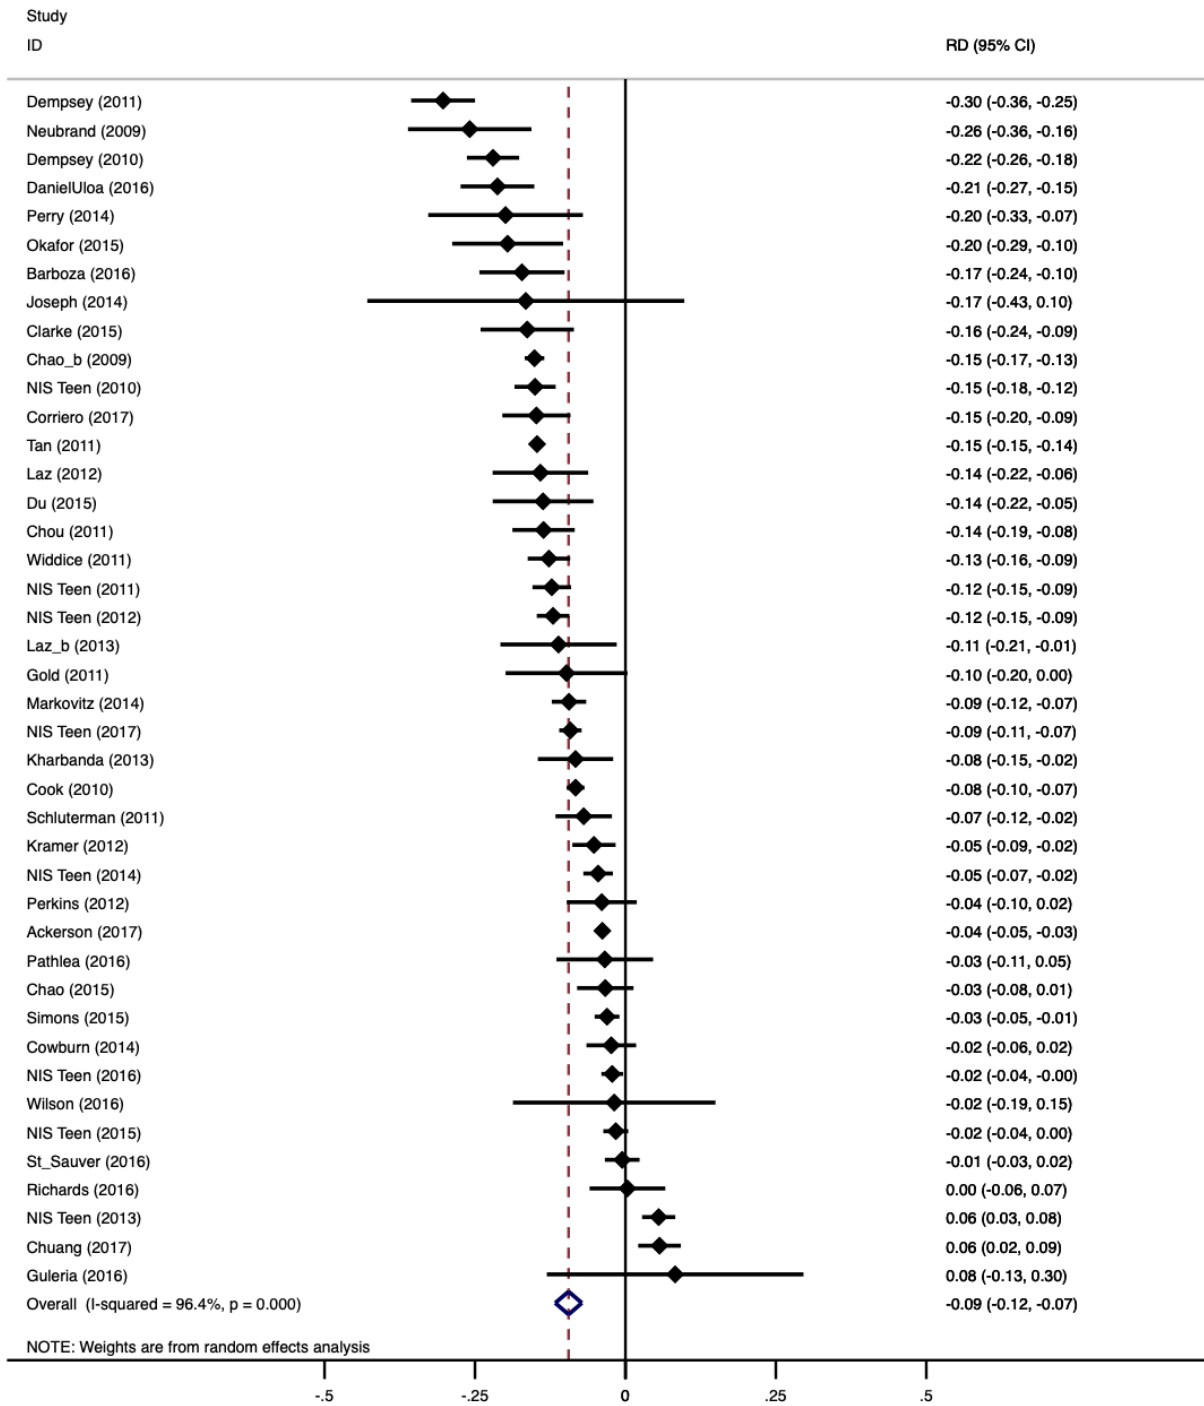

Supplement: NIHMS1033834-supplement-Supplemental_Figure_3.pdf [file NIHMS1033834-supplement-Supplemental_Figure_3.pdf]
